# Supplementary material
Source: Springer Nature journal article supplement (https://www.springermedizin.de/resource/supplementary/12865_2010_342_MOESM11_ESM.pdf/9427792)

## A. MDA-p210 IgG 4 weeks

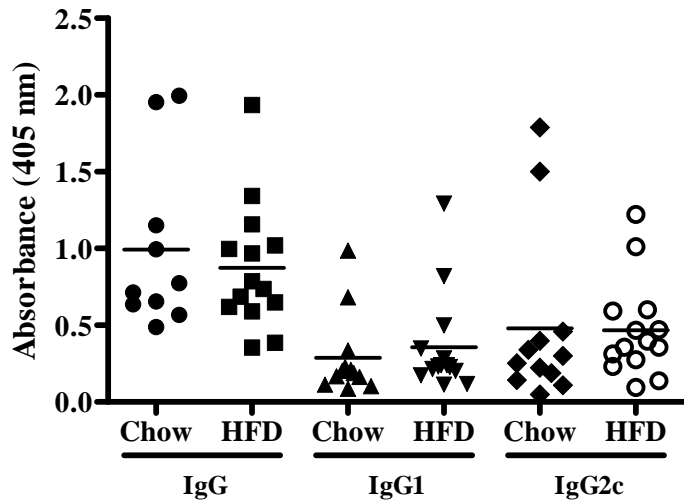

## B. MDA-210 IgG 8 weeks

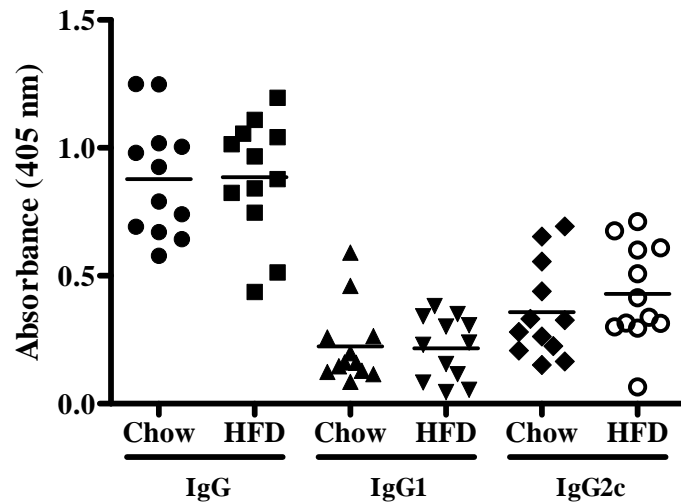

## C. MDA-p210 IgM

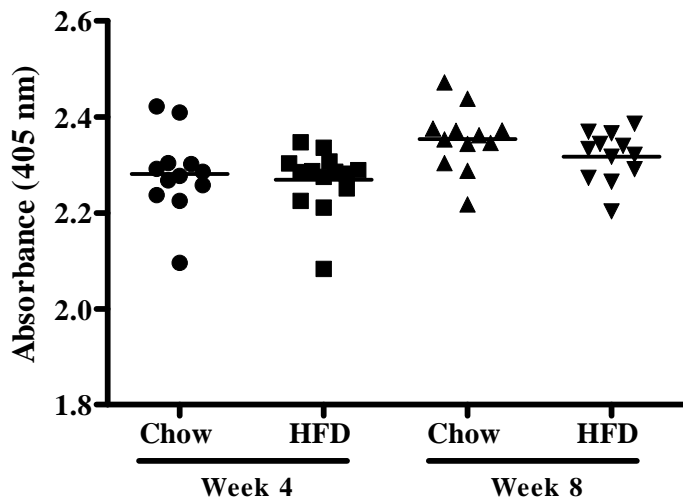

## D. oxLDL IgM

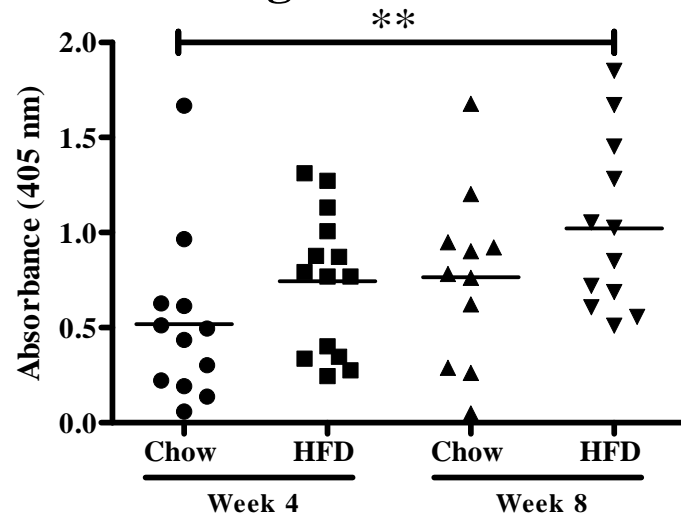

Supplement: MOESM11 [file 9427792]
